# Supplementary material for: Wrist Photoplethysmography Signal Quality Assessment for Reliable Heart Rate Estimate and Morphological Analysis
Source: MDPI journal article supplement (doi:10.3390/s22155831), 2022-08-04
Supplement: s1 [file s1]

## Supplementary Materials

**Table S1.** The computational complexity for each feature. N = pulse length

| Feature                    | Computational complexity |
|----------------------------|--------------------------|
| Peak2peakACC               | 1                        |
| MeanACC                    | N                        |
| SigSim                     | N                        |
| Entropy                    | 7*N                      |
| Kurtosis                   | 4*N                      |
| SNR                        | 8*N                      |
| RelPower                   | 2*N                      |
| Skewness                   | 6*N                      |
| ZR                         | 3                        |
| Amplitude                  | 1                        |
| Width                      | 1                        |
| TroughDepth                | 1                        |
| MedianPulse                | N                        |
| MedianPulse <sub>noZ</sub> | N                        |
| MeanPulse <sub>noZ</sub>   | N                        |
| StdPulse <sub>noZ</sub>    | 4*N                      |
| SNR_Moody                  | 8                        |
| N <sub>peaks</sub>         | 1                        |
| ZDR                        | N                        |

**Table S2.** Results from neighborhood component analysis for the Basic-quality classifier (BQ) applied ten times

[illegible]

**Table S3.** Results from neighborhood component analysis for the Type 1 High-quality classifier (HQ1) applied ten times

[illegible]

**Table S4.** Results from neighborhood component analysis for the Type 2 High-quality classifier (HQ2) applied ten times

[illegible]

**Table S5.** Hyperparameters for the Basic-quality classifiers

| Algorithms                   | Hyperparameters                  | All features           | SQIs selection         |
|------------------------------|----------------------------------|------------------------|------------------------|
| Tree                         | Maximum number of splits         | 39                     | 38                     |
|                              | Split criterion                  | Gini's diversity index | Gini's diversity index |
| Naïve Bayes (NB)             | Distribution names               | Kernel                 | Kernel                 |
|                              | Kernel type                      | Gaussian               | Gaussian               |
| Support Vector Machine (SVM) | Kernel function                  | Quadratic              | Gaussian               |
|                              | Kernel scale                     | 1                      | 27.494                 |
|                              | Box constraints                  | 0.025078               | 119.112                |
|                              | Standardize data                 | True                   | False                  |
|                              |                                  |                        |                        |
| K-nearest neighborhood (KNN) | Number of neighbors              | 10                     | 5                      |
|                              | Distance metrics                 | Correlation            | Chebyshev              |
|                              | Distance weight                  | Inverse                | Squared inverse        |
|                              | Standardize data                 | True                   | False                  |
| Ensemble                     | Ensemble method                  | GentleBoost            | Bag                    |
|                              | Maximum number of splits         | 21                     | 1025                   |
|                              | Number of learners               | 400                    | 285                    |
|                              | Learning rate                    | 0.0093026              | -                      |
| Neural Network               | Number of fully connected layers | 2                      | 1                      |
|                              | Activation function              | Sigmoid                | Tanh                   |
|                              | Regularization strength          | 1,18E-06               | 5,45E-05               |
|                              | Standardize data                 | No                     | No                     |
|                              | 1st layer size                   | 5                      | 3                      |
|                              | 2nd layer size                   | 204                    | -                      |
|                              | 3rd layer size                   | -                      | -                      |
| Elgendi 2016 (SVM)           | Kernel function                  | Gaussian               |                        |
|                              | Kernel scale                     | 0.48469                |                        |
|                              | Box constraints                  | 0.015755               |                        |
|                              | Standardize data                 | True                   |                        |

**Table S6.** Hyperparameters for the Type 1 High-quality classifiers

| Algorithms                   | Hyperparameters                  | All features           | SQIs selection         |
|------------------------------|----------------------------------|------------------------|------------------------|
| Tree                         | Maximum number of splits         | 39                     | 38                     |
|                              | Split criterion                  | Gini's diversity index | Gini's diversity index |
| Naïve Bayes (NB)             | Distribution names               | Kernel                 | Kernel                 |
|                              | Kernel type                      | Gaussian               | Gaussian               |
| Support Vector Machine (SVM) | Kernel function                  | Quadratic              | Gaussian               |
|                              | Kernel scale                     | 1                      | 27.494                 |
|                              | Box constraints                  | 0.025078               | 119.112                |
|                              | Standardize data                 | True                   | False                  |
|                              |                                  |                        |                        |
| K-nearest neighborhood (KNN) | Number of neighbors              | 10                     | 5                      |
|                              | Distance metrics                 | Correlation            | Chebyshev              |
|                              | Distance weight                  | Inverse                | Squared inverse        |
|                              | Standardize data                 | True                   | False                  |
| Ensemble                     | Ensemble method                  | GentleBoost            | Bag                    |
|                              | Maximum number of splits         | 21                     | 1025                   |
|                              | Number of learners               | 400                    | 285                    |
|                              | Learning rate                    | 0.0093026              | -                      |
| Neural Network               | Number of fully connected layers | 2                      | 1                      |
|                              | Activation function              | Sigmoid                | Tanh                   |
|                              | Regularization strength          | 1,18E-06               | 5,45E-05               |
|                              | Standardize data                 | No                     | No                     |
|                              | 1st layer size                   | 5                      | 3                      |
|                              | 2nd layer size                   | 204                    | -                      |
|                              | 3rd layer size                   | -                      | -                      |
| Elgendi 2016 (SVM)           | Kernel function                  | Gaussian               |                        |
|                              | Kernel scale                     | 0.48469                |                        |
|                              | Box constraints                  | 0.015755               |                        |
|                              | Standardize data                 | True                   |                        |

**Table S7.** Hyperparameters for the Type 2 High-quality classifiers

| Algorithms                   | Hyperparameters                  | All features           | SQIs selection         |
|------------------------------|----------------------------------|------------------------|------------------------|
| Tree                         | Maximum number of splits         | 69                     | 53                     |
|                              | Split criterion                  | Gini's diversity index | Gini's diversity index |
| Naïve Bayes (NB)             | Distribution names               | Gaussian               | Gaussian               |
|                              | Kernel type                      | Epanechnikov           | Triangle               |
| Support Vector Machine (SVM) | Kernel function                  | Linear                 | Quadratic              |
|                              | Kernel scale                     | 1                      | 1                      |
|                              | Box constraints                  | 0.8367                 | 55.859                 |
|                              | Standardize data                 | False                  | False                  |
| K-nearest neighborhood (KNN) | Number of neighbors              | 3                      | 39                     |
|                              | Distance metrics                 | City block             | Chebyshev              |
|                              | Distance weight                  | Squared inverse        | Squared inverse        |
|                              | Standardize data                 | False                  | False                  |
| Ensemble                     | Ensemble method                  | GentleBoost            | Bag                    |
|                              | Maximum number of splits         | 494                    | 223                    |
|                              | Number of learners               | 116                    | 480                    |
|                              | Learning rate                    | 0.44184                | -                      |
| Neural Network               | Number of fully connected layers | 3                      | 1                      |
|                              | Activation function              | Tanh                   | Sigmoid                |
|                              | Regularization strength          | 4,02E-06               | 2,81E-09               |
|                              | Standardize data                 | False                  | False                  |
|                              | 1st layer size                   | 2                      | 4                      |
|                              | 2nd layer size                   | 1                      | -                      |
| Elgendi 2016 (SVM)           | 3rd layer size                   | 175                    | -                      |
|                              | Kernel function                  | Quadratic              |                        |
|                              | Kernel scale                     | 1                      |                        |
|                              | Box constraints                  | 0,0017795              |                        |
|                              | Standardize data                 | False                  |                        |
